# Supplementary material for: Stereochemical modulation of emission behaviour in E/Z isomers of diphenyldipyrroethene from aggregation induced emission to crystallization induced emission
Source: Royal Society of Chemistry journal article supplement (doi:10.1039/c5cp02400e), 2015-01-01
Supplement: c5cp02400e1.pdf [file c5cp02400e1.pdf]

## Supplementary material

### **Stereochemical Modulation of Emission Behavior in *E/Z* Isomers of Diphenyldipyrroethene from Aggregation Induced Emission to Crystal Induced Emission**

**K. Garg,<sup>a</sup> E. Ganapathi,<sup>a</sup> P. Rajakannu<sup>b</sup> and M. Ravikanth<sup>a\*</sup>**

Department of chemistry, and Indian institute of Technology Bombay, Powai,  
Mumbai-40076, India.

[E mail: ravikanth@iitb.ac.in](mailto:ravikanth@iitb.ac.in); [kavitachemistry1@gmail.com](mailto:kavitachemistry1@gmail.com)

## Contents

| <b>S.No</b> | <b>Title</b>                                                                                   | <b>Page no.</b> |
|-------------|------------------------------------------------------------------------------------------------|-----------------|
| 1           | <sup>1</sup> H NMR spectrum of <i>E</i> -DPYDPE                                                | <b>S1</b>       |
| 2           | <sup>1</sup> H NMR spectrum of <i>Z</i> -DPYDPE                                                | <b>S2</b>       |
| 3           | <sup>13</sup> C NMR spectrum of DPYDPE                                                         | <b>S3</b>       |
| 4           | LRMS spectrum of DPYDPE                                                                        | <b>S4</b>       |
| 5           | <sup>1</sup> H- <sup>1</sup> H COSY spectrum of <i>E</i> -DPYDPE                               | <b>S5</b>       |
| 6           | <sup>1</sup> H- <sup>1</sup> H COSY spectrum of <i>Z</i> -DPYDPE                               | <b>S6</b>       |
| 7           | Powder XRD of solid films and nanoaggregates                                                   | <b>S7</b>       |
| 8           | Comparison of absorption spectra of <i>Z</i> -DPYDPE with various anions                       | <b>S8</b>       |
| 9           | Comparison of emission spectra of <i>Z</i> -DPYDPE with various anions                         | <b>S9</b>       |
| 10          | Photograph of colour change induced upon addition of anions for <i>Z</i> -DPYDPE in day light  | <b>S10</b>      |
| 11          | Photograph of colour change induced upon addition of anions for <i>Z</i> -DPYDPE under Uv-lamp | <b>S11</b>      |

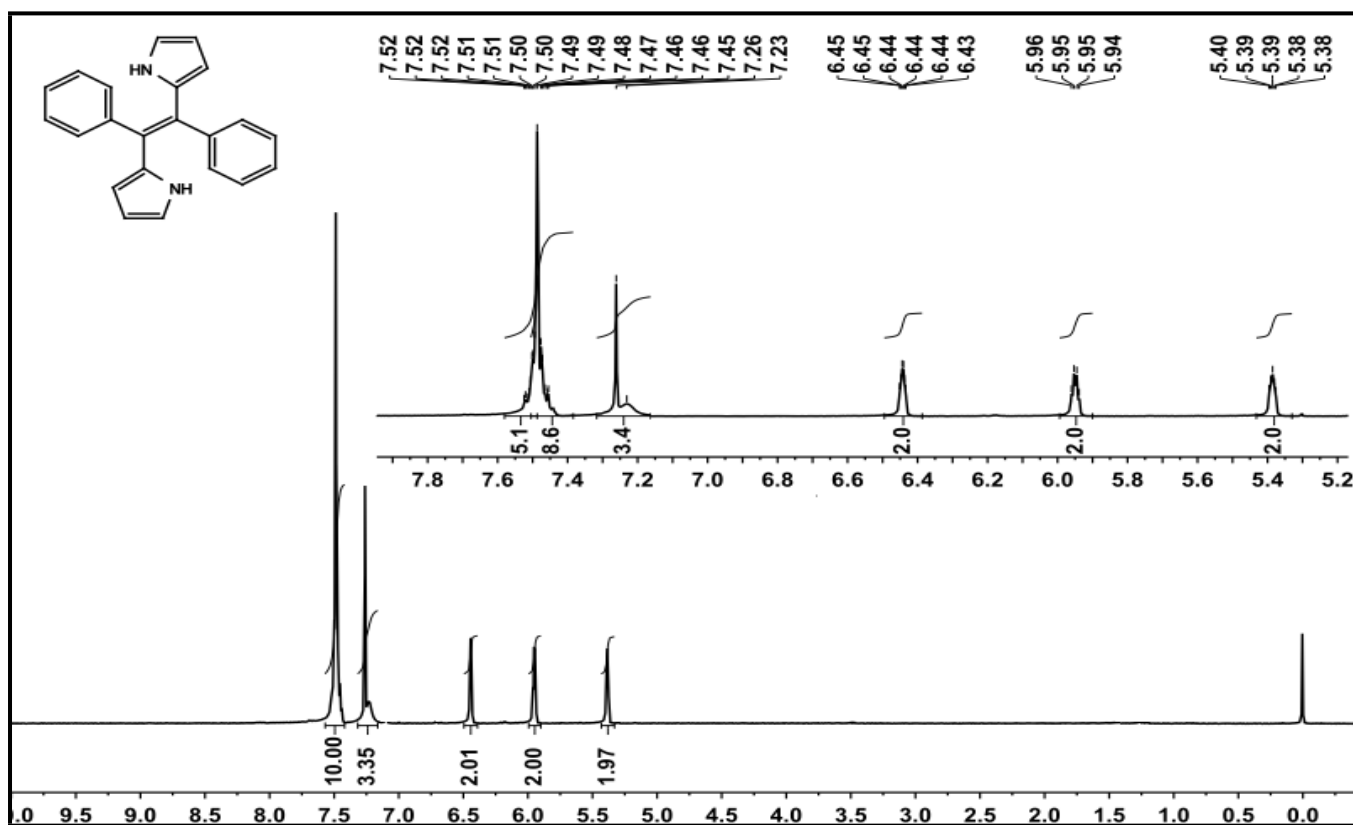

**Figure S1:**  $^1\text{H}$  NMR spectrum of *E*-DPYDPE recorded in  $\text{CDCl}_3$ . Inset shows the expansion.

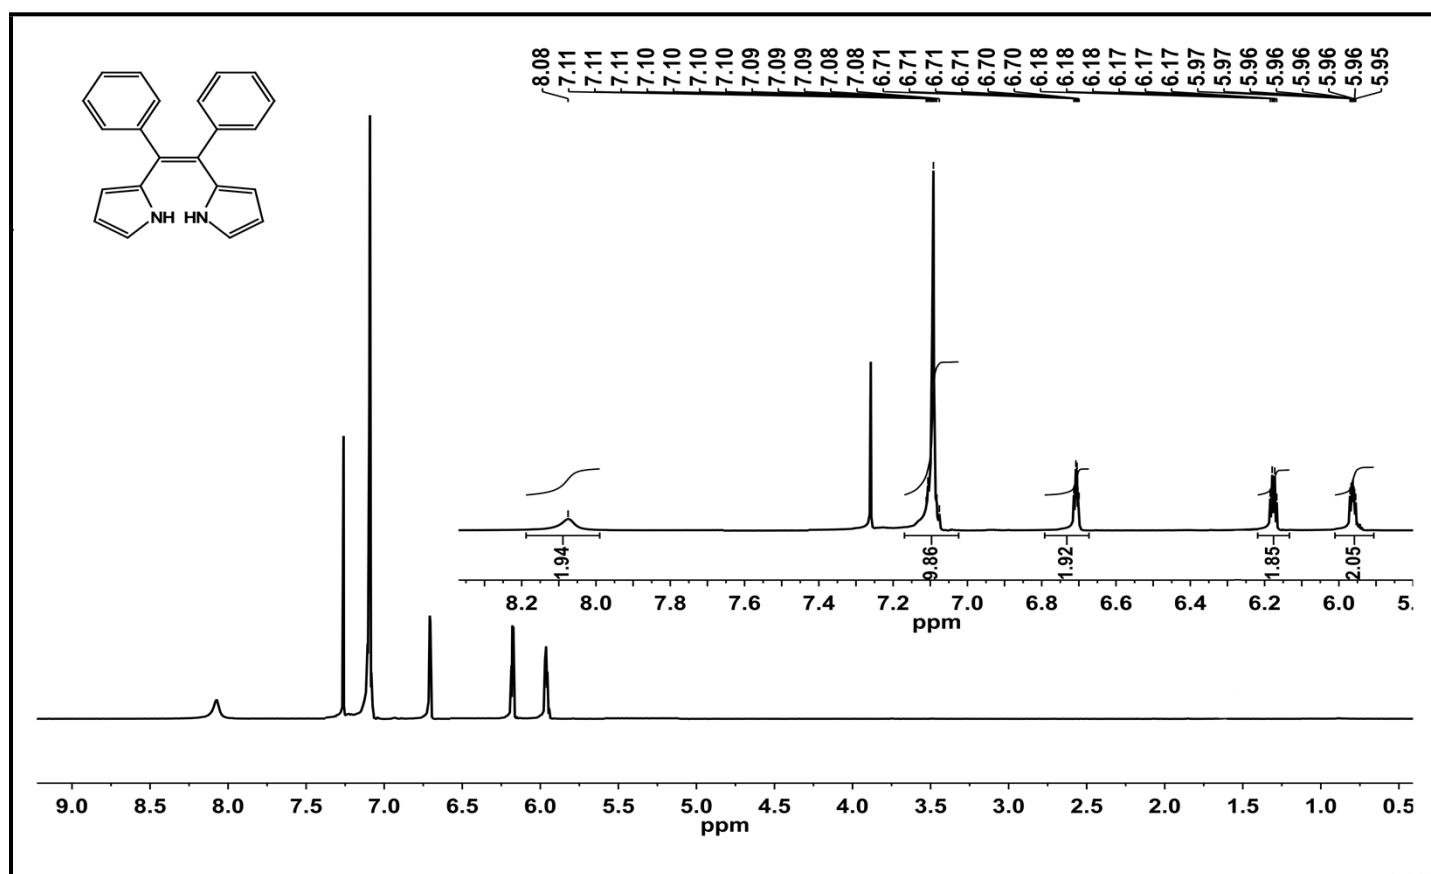

**Figure S2:**  $^1\text{H}$  NMR spectrum of Z-DPYDPE recorded in  $\text{CDCl}_3$ . Inset shows the expansion

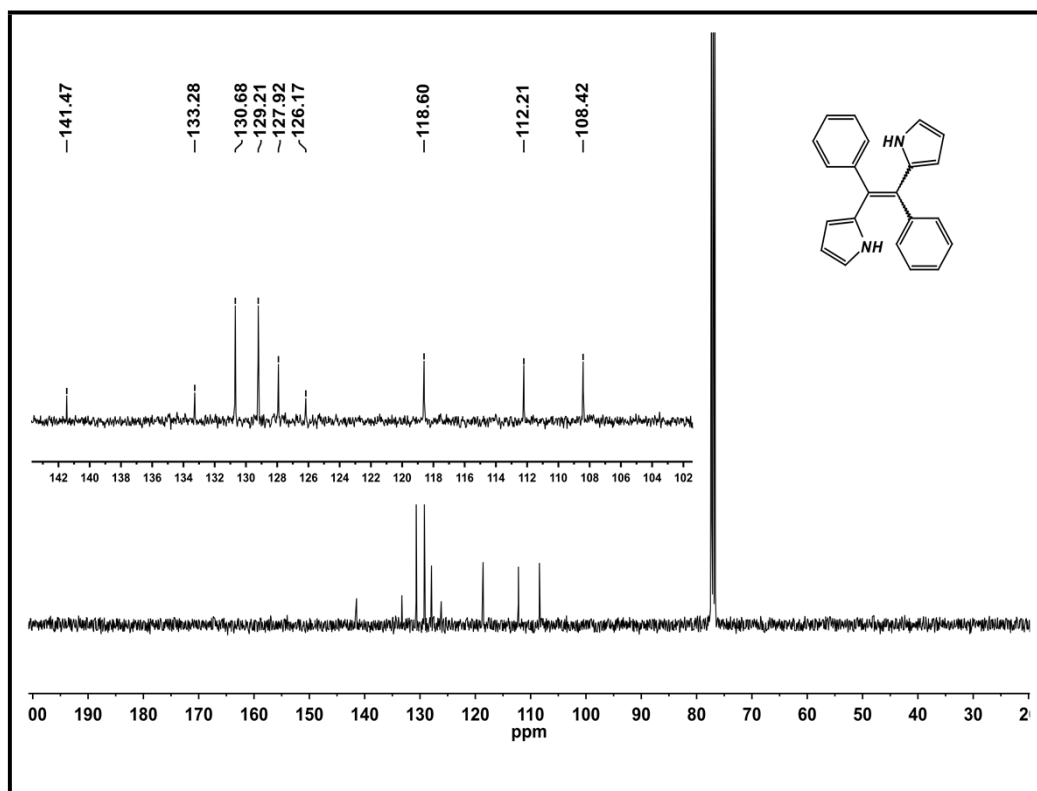

**Figure S3:**  $^{13}\text{C}$  NMR spectrum of *E*-DPYDPE recorded in  $\text{CDCl}_3$ . Inset shows the expansion.

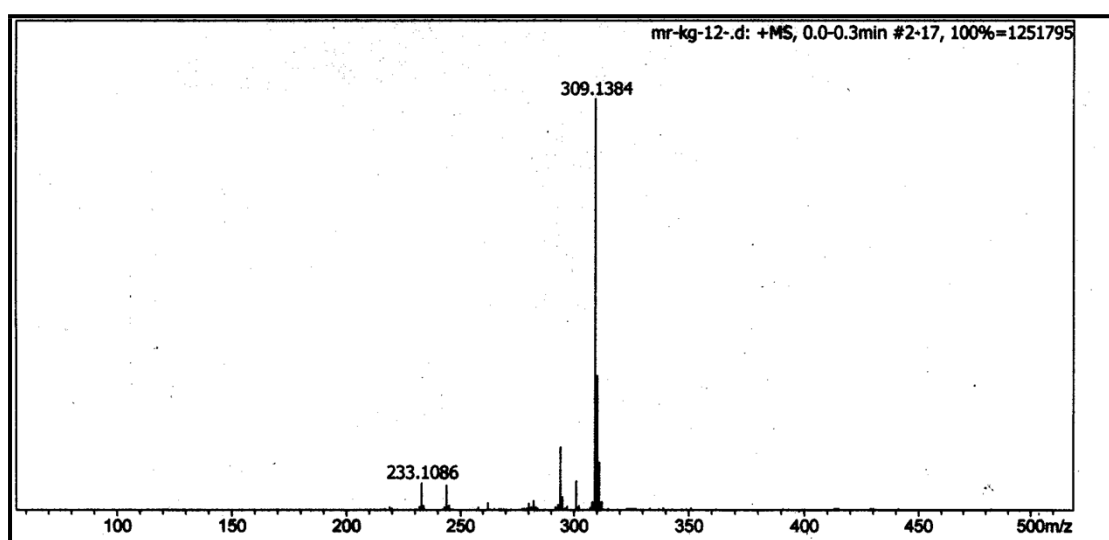

Figure S4: LRMS spectrum of DPYDPE

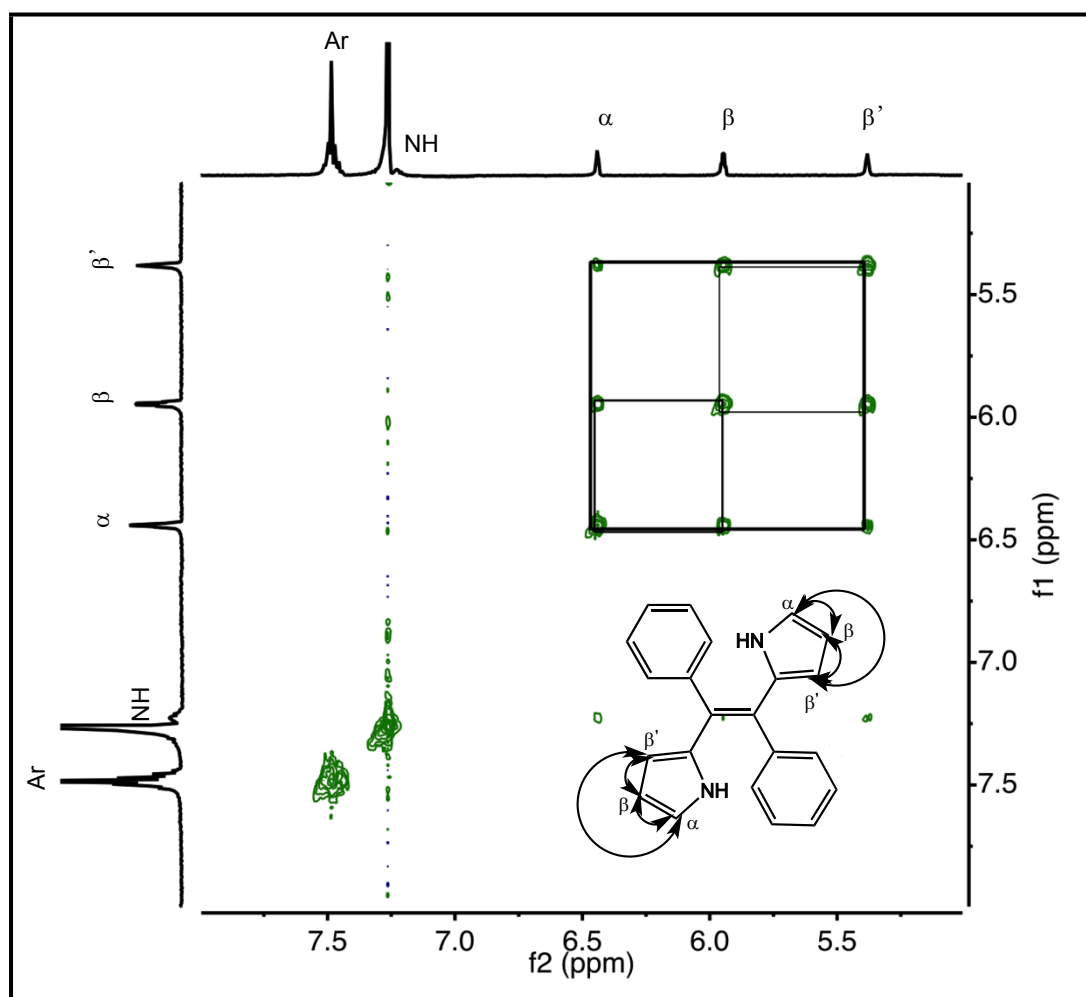

**Figure S5:**  $^1\text{H}$ - $^1\text{H}$  COSY NMR spectrum of *E*-DPYDPE recorded in  $\text{CDCl}_3$ .

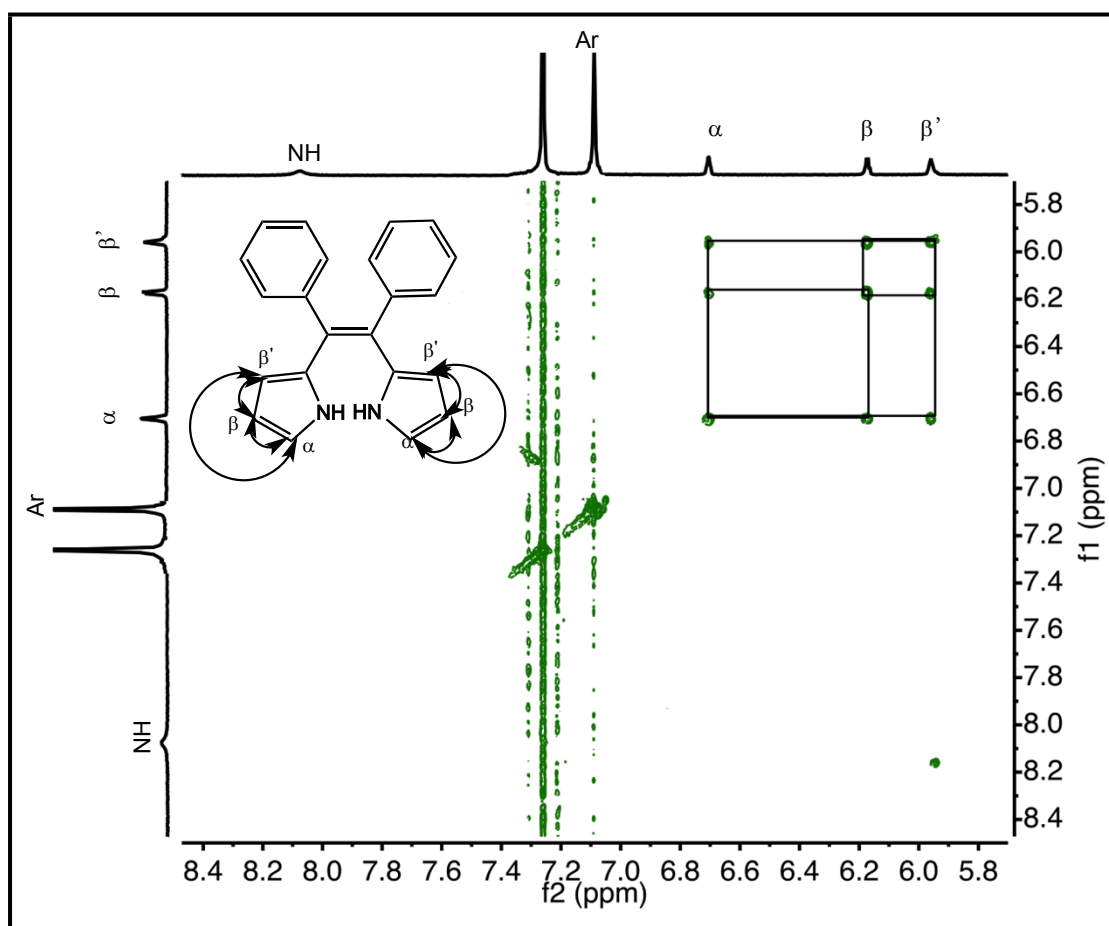

**Figure S6:**  $^1\text{H}$ - $^1\text{H}$  COSY NMR spectrum of Z-DPYDPE recorded in  $\text{CDCl}_3$ .



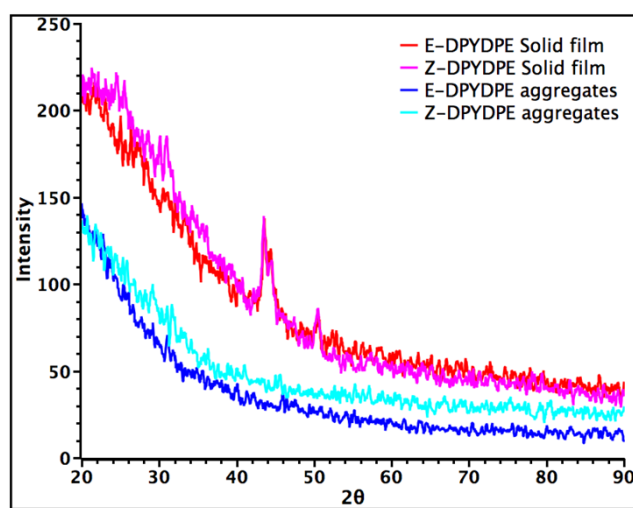

**Figure S7:** Powder X-Ray Diffraction of thin film and nanoaggregates

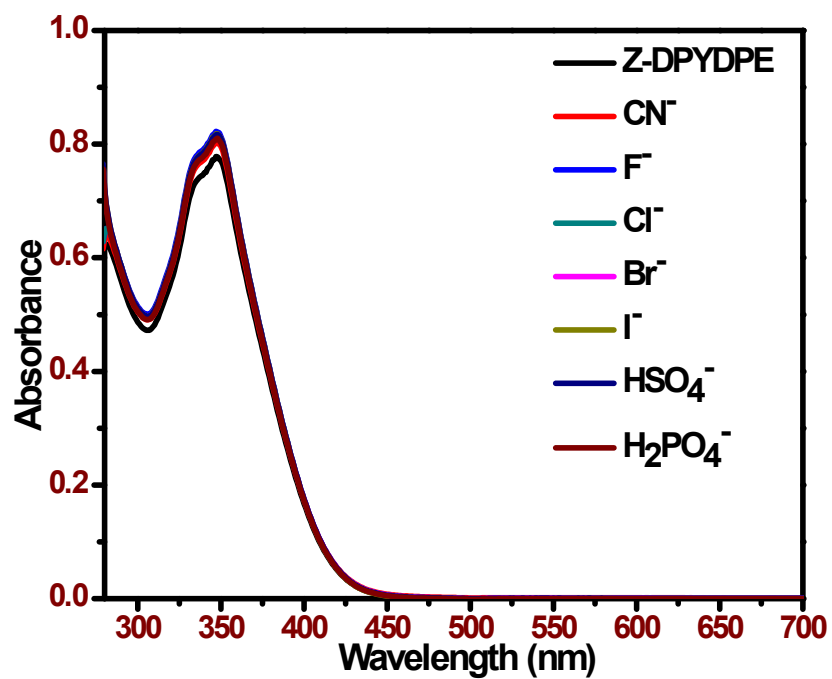

**Figure S8:** Comparison of absorption spectra of Z-DPYDPE with in presence of various anions (tetrabutyl ammonium salt) recorded in CH<sub>3</sub>CN solvent.

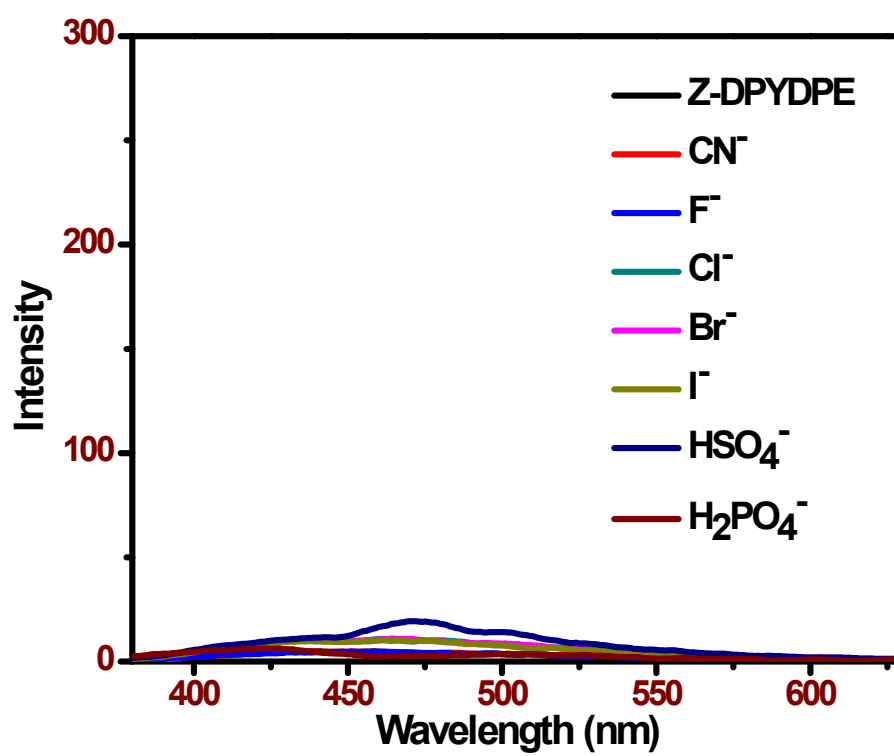

**Figure S9:** Comparison of emission spectra of Z-DPYDPE with in presence of various anions (tetrabutyl ammonium salt) recorded in CH<sub>3</sub>CN solvent.

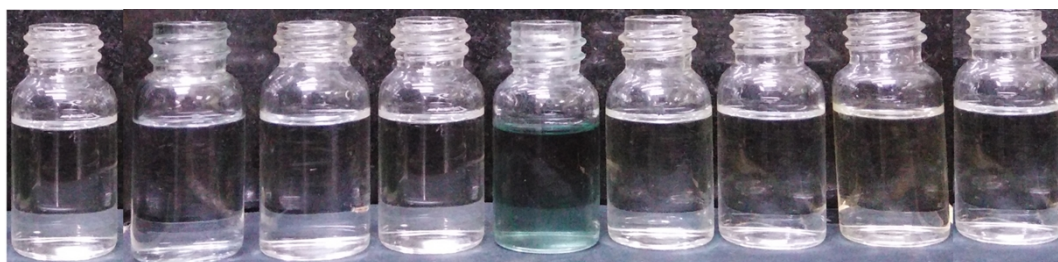

**Figure S10:** Colour change induced upon addition of (excess equivalents of perchlorate salts) different metal ions to Z-DPYDPE (in  $\text{CH}_3\text{CN}$ ) under daylight: From left to right: (1) no metal ion, (2)  $\text{Zn}^{2+}$ , (3)  $\text{Cu}^{2+}$ , (4)  $\text{Fe}^{2+}$ , (5)  $\text{Hg}^{2+}$ , (6)  $\text{Ni}^{2+}$ , (7)  $\text{Co}^{2+}$ , (8)  $\text{Cd}^{2+}$ , (9)  $\text{Mn}^{2+}$

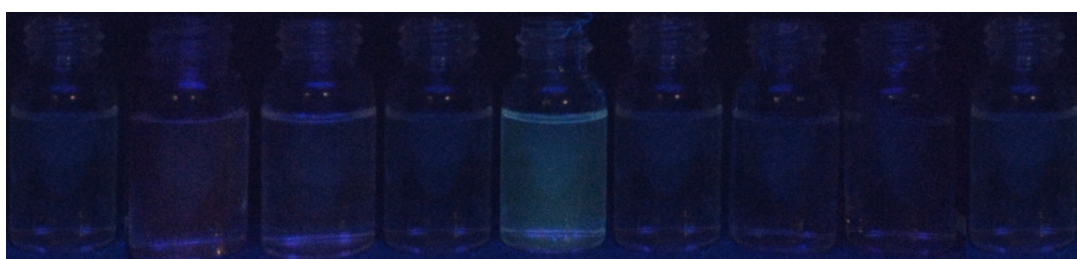

**Figure S11:** Colour change induced upon addition of (excess equivalents of perchlorate salts) different metal ions to Z-DPYDPE (in CH<sub>3</sub>CN) under UV lamp: From left to right: (1) no metal ion, (2) Zn<sup>2+</sup>, (3) Cu<sup>2+</sup>, (4) Fe<sup>2+</sup>, (5) Hg<sup>2+</sup>, (6) Ni<sup>2+</sup>, (7) Co<sup>2+</sup>, (8) Cd<sup>2+</sup>, (9) Mn<sup>2+</sup>
